# Supplementary material for: Increased Alcohol Consumption in Mice Lacking Sodium Bicarbonate Transporter NBCn1
Source: PubMed Central journal article supplement (PMC7335059; doi:10.1038/s41598-020-67291-0), 2020-07-03
Supplement: 41598_2020_67291_MOESM1_ESM.pdf [file 41598_2020_67291_MOESM1_ESM.pdf]

## **Increased Alcohol Consumption in Mice Lacking Sodium Bicarbonate Transporter NBCn1**

Jesse R. Schank<sup>1</sup>, Soojung Lee<sup>2</sup>, Carlos E. Gonzalez-Islas<sup>2</sup>, Sadie E. Nennig<sup>1</sup>, Hannah D. Fulenwider<sup>1</sup>, Jianjun Chang<sup>2</sup>, Jun Ming Li<sup>2</sup>, Yejin Kim<sup>2</sup>, Lauren A. Jeffers<sup>3</sup>, Jaegwon Chung<sup>1</sup>, Jae-Kyung Lee<sup>1</sup>, Zhe Jin<sup>4</sup>, Christian Aalkjaer<sup>5</sup>, Ebbe Boedtkjer<sup>5</sup>, and Inyeong Choi<sup>2,\*</sup>

<sup>1</sup>Department of Physiology and Pharmacology, University of Georgia College of Veterinary Medicine, Athens, GA 30602, USA

<sup>2</sup>Department of Physiology, Emory University School of Medicine, Atlanta, GA 30322, USA

<sup>3</sup>Department of Medicine, Pulmonary Division, Emory University School of Medicine, Atlanta, GA 30322, USA

<sup>4</sup>Department of Neuroscience, Uppsala University, Uppsala 75124, Sweden

<sup>5</sup>Department of Biomedicine, Aarhus University, 8000 Aarhus C, Denmark

\*Correspondence: Inyeong Choi, Ph.D., Department of Physiology, Emory University School of Medicine, Atlanta, GA 30322, USA. Phone 404-712-2092; Fax 404-727-2648; Email: [ichoi@emory.edu](mailto:ichoi@emory.edu)

**Table S1.** Demographic data of controls and alcoholics

| Subject No.       | Age (Years) | PMI (Hours) | Brain pH | Smoking History | RQI | Ethnicity | Liver path | Cause of death                                                      | History of psychiatric illness                               |
|-------------------|-------------|-------------|----------|-----------------|-----|-----------|------------|---------------------------------------------------------------------|--------------------------------------------------------------|
| <b>CONTROLS</b>   |             |             |          |                 |     |           |            |                                                                     |                                                              |
| 3                 | 63          | 72          | 6.9      | Ex-smoker       | 8.1 | Caucasian | Congestion | Cardiac: Severe coronary artery atherosclerosis                     | None                                                         |
| 5                 | 43          | 66          | 6.2      | Not available   | 6.0 | Caucasian | Congestion | Respiratory: Aspiration pneumonia. Complicating multi drug toxicity | None                                                         |
| 6                 | 69          | 16          | 6.6      | Yes             | 8.2 | Caucasian | Normal     | Cardiac: Atherosclerotic cardiovascular disease                     | None                                                         |
| 8                 | 57          | 18          | 6.6      | Ex-smoker       | 7.8 | Caucasian | Congestion | Cardiac: Ischemic heart disease                                     | None                                                         |
| 11                | 47          | 38          | 6.74     | Yes             | 8.6 | Caucasian | Steatosis  | Cardiac                                                             | None                                                         |
| 17                | 58          | 28          | 5.92     | Yes             | 5.7 | Caucasian |            | Cardiac                                                             | None                                                         |
| 18                | 59          | 40          | 6.53     | Ex-smoker       | 6.4 | Caucasian | Normal     | Cardiac                                                             | None                                                         |
| 19                | 59          | 43          | 6.69     | Yes             | 8.4 | Caucasian | Steatosis  | Cardiac                                                             | None                                                         |
| 27                | 69          | 52          | 6.95     | No              | 8.6 | Caucasian | Normal     | Cardiac                                                             | None                                                         |
| 29                | 54          | 29          | 6.8      | No              | 7.3 | Asian     | Steatosis  | Cardiac                                                             | None                                                         |
| <b>ALCOHOLICS</b> |             |             |          |                 |     |           |            |                                                                     |                                                              |
| 15                | 54          | 17          | 6.41     | Yes             | 8.3 | Caucasian | Steatosis  | Trauma: Chest and abdominal injury, Ischemic Heart Disease          | None                                                         |
| 16                | 55          | 17          | 6.85     | No              | 8.5 | Caucasian | Congestion | Respiratory                                                         | Depression for 17 years, no antidepressants                  |
| 17                | 55          | 48          | 7.02     | Yes             | 8.6 | Caucasian | Cirrhosis  | Cardiac                                                             | Depression/anxiety for 6 years, treated with antidepressants |
| 19                | 58          | 44.5        | 6.47     | Yes             | 8.2 | Caucasian | Cirrhosis  | Cardiac                                                             | None                                                         |
| 22                | 60          | 16.5        | 6.48     | Yes             | 8.6 | Caucasian | Cirrhosis  | Hepatic                                                             | None                                                         |
| 24                | 63          | 25.5        | 6.21     | Yes             | 5.0 | Caucasian | Congestion | Cardiac                                                             | None                                                         |
| 25                | 64          | 39          | 6.76     | Yes             | 9.0 | Caucasian | Steatosis  | Toxicity                                                            | Depression for 3 years, treated with antidepressants.        |
| 26                | 69          | 22          | 5.82     | Yes             | 5.7 | Caucasian | Congestion | Toxicity                                                            | Depression for 50 years, treated with                        |

|    |    |    |      |     |     |           |            |                         |                                                                                |
|----|----|----|------|-----|-----|-----------|------------|-------------------------|--------------------------------------------------------------------------------|
| 27 | 70 | 62 | 6.82 | Yes | 7.1 | Caucasian | Congestion | Cardiac: Cardiomyopathy | antidepressants for 4 years (27 years prior)                                   |
| 29 | 43 | 29 | 6.29 | Yes | 6.2 | Caucasian | Steatosis  | Blood loss              | Depression and suicidal 12 months prior to death, treated with antidepressants |
|    |    |    |      |     |     |           |            |                         | None                                                                           |

PMI, post-mortem interval; RQI, RNA quality indicator.

**Table S2.** Sample demographic information.

| Characteristics | Controls    | Alcoholics  | <i>P</i> value |
|-----------------|-------------|-------------|----------------|
| Number          | 10          | 10          |                |
| Age (years)     | 57.8 ± 2.65 | 59.1 ± 2.53 | 0.99           |
| PMI (h)         | 40.2 ± 5.95 | 32.1 ± 4.95 | 0.22           |
| Brain pH        | 6.6 ± 0.10  | 6.5 ± 0.11  | 0.99           |
| RQI             | 7.5 ± 0.35  | 7.5 ± 0.45  | 0.99           |

Data are shown as mean ± SEM, and the difference between controls and alcoholics was tested with Student t-test.

**Table S3.** qPCR primers

| <b>Gene</b>    | <b>Forward Primer</b>     | <b>Reverse Primer</b>  |
|----------------|---------------------------|------------------------|
| NBCn1          | GTAATGGAAGTGGTGGGAAGCAGAG | GGATCCCACTCTCCTGGAG    |
| UBC1           | CGGTGAACGCCGATGATTAT      | ATCTGCATTGTCAAGTGACGA  |
| TBP            | GAGCTGTGATGTGAAGTTTCC     | TCTGGGTTTGATCATTCTGTAG |
| $\beta$ -actin | CCTGGCACCCAGCACAAT        | GGCCCGGACTCGTCATACT    |

Data are shown as mean  $\pm$  SEM, and the difference between controls and alcoholics was tested with Student t-test.

**Table S4. Cytotoxicity in primary cultures from mice**

| Postnatal | # of mice | Cell/well       | LDH release (%) |
|-----------|-----------|-----------------|-----------------|
| P5        | 3         | $1 \times 10^4$ | $17.5 \pm 1.14$ |
| P7        | 3         | $1 \times 10^4$ | $16.1 \pm 0.43$ |

**LDH release:** Neurons in a 24-well plate ( $1 \times 10^4$  cells/well) were rinsed twice with cell buffer and treated with 1% Triton X-100 or none. LDH release from neurons was quantitated using the Cytotoxicity Detection kit LDH (Roche). LDH release in the presence of Triton X-100 is the total release. Cytotoxicity was expressed as the percentage of total LDH release after subtracting background (no cells). The results show 83–84% cell survival.

**Figure S1.**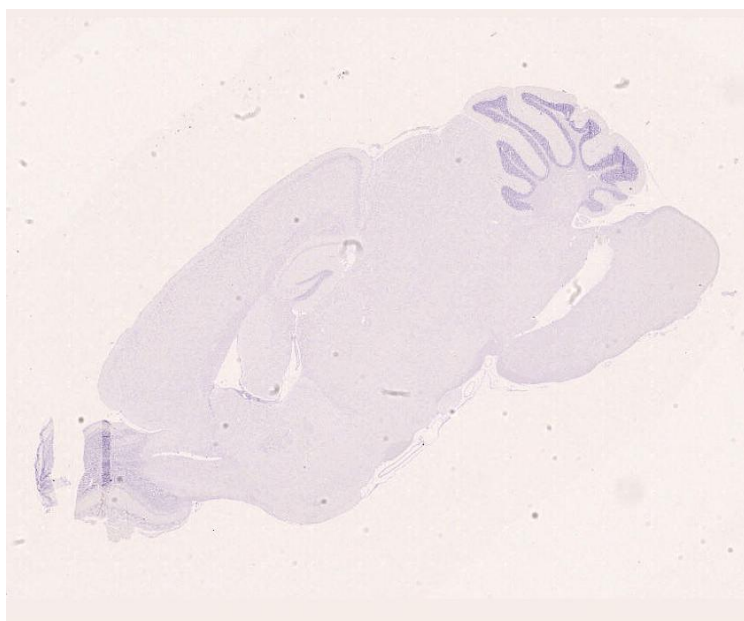

**Figure legend.** Negative control in immunohistochemistry. Immunostaining without a primary antibody was performed as described in the main text. Briefly, mouse brain tissues were fixed in 4% paraformaldehyde, dehydrated in 30% sucrose, and embedded in paraffin. Paraffin sections (5  $\mu\text{m}$  thick) were heated, deparaffinized in xylene, rehydrated through graded alcohol rinses, and incubated in 3%  $\text{H}_2\text{O}_2$  for 20 min. Antigen retrieval was done by heating in 10 mM citrate buffer (pH 4.0) in a microwave for 2 min. Sections were blocked with 1% bovine serum albumin in phosphate-buffered saline (PBS) and then with PBS at 4°C overnight. Sections were then incubated with an anti-rabbit horseradish peroxidase-conjugated secondary antibody (cat. #: 7074; Cell Signaling Technology, USA) diluted at 1:1000 for 1 hr at room temperature. Sections were stained with 3,3'-diaminobenzidine (DAB) and then counterstained with hematoxylin.
